# Supplementary material
Source: PubMed Central journal article supplement (PMC3620034)
Supplement: NIHMS397283-supplement-01.pdf [file NIHMS397283-supplement-01.pdf]

## **Supplemental Data**

Fig. S1. A-D) Microarray analysis of chicken tissues. Principal component analysis on 55 RNA samples suggests the data forms two groups due to age and tissue type. E) Analysis of variance (4way ANOVA) on the 55 RNA samples demonstrates two factors; age and tissue type, contribute to the majority of variance in the data set.

Fig. S2. Differential gene expression analysis of adult and embryonic chicken tissues. Representative lists of genes that contribute to the differentiation of feather forming (A) epithelium and (B) mesenchyme are tabulated. C) Two dimensional hierarchical cluster analysis demonstrates the gene expression patterns of adult and embryonic tissues. D) Our data sets exhibit enrichment in many developmental pathways. Red is up-regulated and green is down-regulated gene expression.

Video movie file.

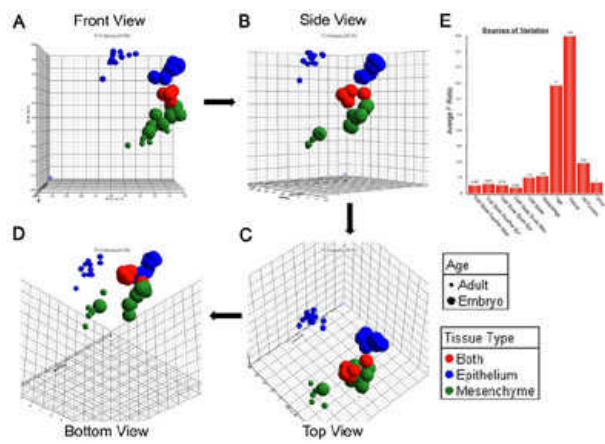

Fig. S1.

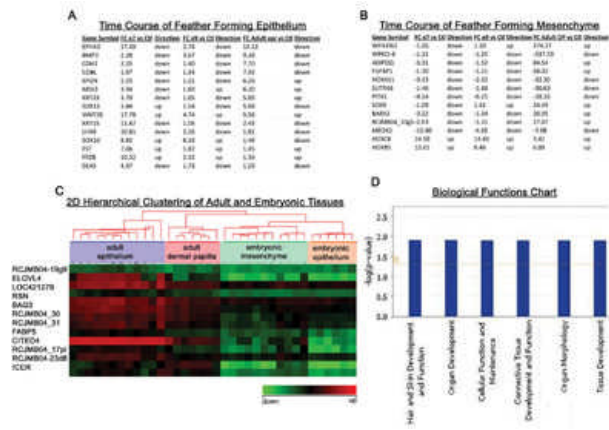

Fig. S2.
